# Supplementary material
Source: PubMed Central journal article supplement (PMC2853219)
Supplement: 00460.2009_1.pdf [file 00460.2009_1.pdf]

## **Supplemental movies**

**Movie S1) 3D reconstruction and rotation of a clear cell perfused under control conditions.** The 3D reconstruction was performed from a stack of 0.1- $\mu\text{m}$  interval images, acquired using a Zeiss Radiance 2000 confocal microscope (Zeiss laboratories), from a 10- $\mu\text{m}$  thick section of cauda epididymis stained for the V-ATPase (green) and HRP (red). The V-ATPase is distributed between short apical microvilli and the intracellular compartment of the cell. Apical endocytic vesicles containing HRP are visible in clear cells and principal cells.

**Movie S2) 3D reconstruction and rotation of a clear cell perfused luminally with ATP.** The 3D reconstruction was performed from a stack of 0.1- $\mu\text{m}$  interval images, acquired using a Zeiss Radiance 2000 confocal microscope (Zeiss laboratories), from a 10- $\mu\text{m}$  thick section of cauda epididymis stained for the V-ATPase (green) and HRP (red). The V-ATPase is present in long apical microvilli and no significant intracellular V-ATPase staining is detected. Apical endocytic vesicles containing HRP are visible in clear cells and principal cells.

**Movie S3) 3D reconstruction and rotation of a clear cell perfused luminally with adenosine.** The 3D reconstruction was performed from a stack of 0.1- $\mu\text{m}$  interval images, acquired using a Zeiss Radiance 2000 confocal microscope (Zeiss laboratories), from a 10- $\mu\text{m}$  thick section of cauda epididymis stained for the V-ATPase (green) and HRP (red). The V-ATPase is present in long apical microvilli and no significant intracellular V-ATPase staining is detected. Apical endocytic vesicles containing HRP are visible in clear cells and principal cells.
